# Supplementary material for: A highly sensitive printed humidity sensor based on a functionalized MWCNT/HEC composite for flexible electronics application
Source: Royal Society of Chemistry journal article supplement (doi:10.1039/c9na00179d), 2019-01-01
Supplement: c9na00179d1.pdf [file c9na00179d1.pdf]

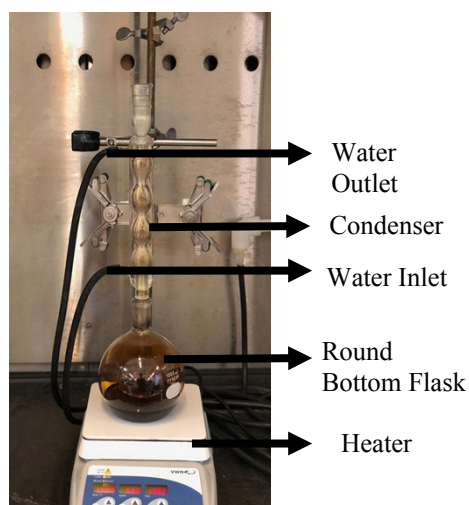

**(a) Acid Reflux Reaction**

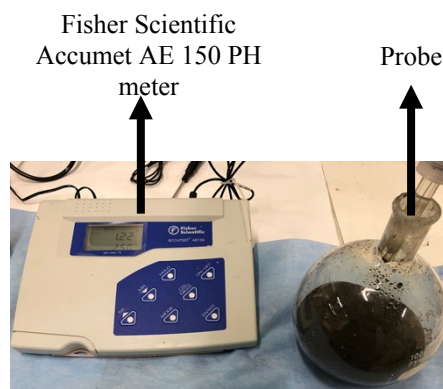

**(b) pH Measurement During Acid-Base Titration**

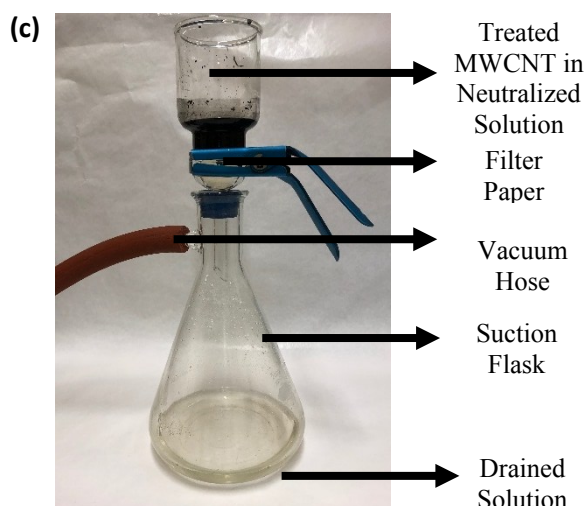

**(c) Vacuum Filtering of Acid Treated MWCNT**

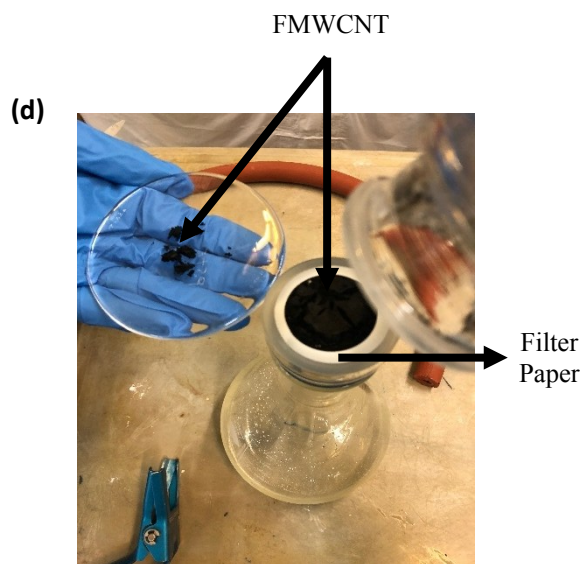

**(d) FMWCNT Recovered after Acid Treatment**

**Figure S1.** Functionalization of MWCNT (a) acid reflux reaction, (b) pH measurement during acid-base titration, (c) vacuum filtering of acid treated MWCNT and (d) FMWCNT recovered after acid treatment.

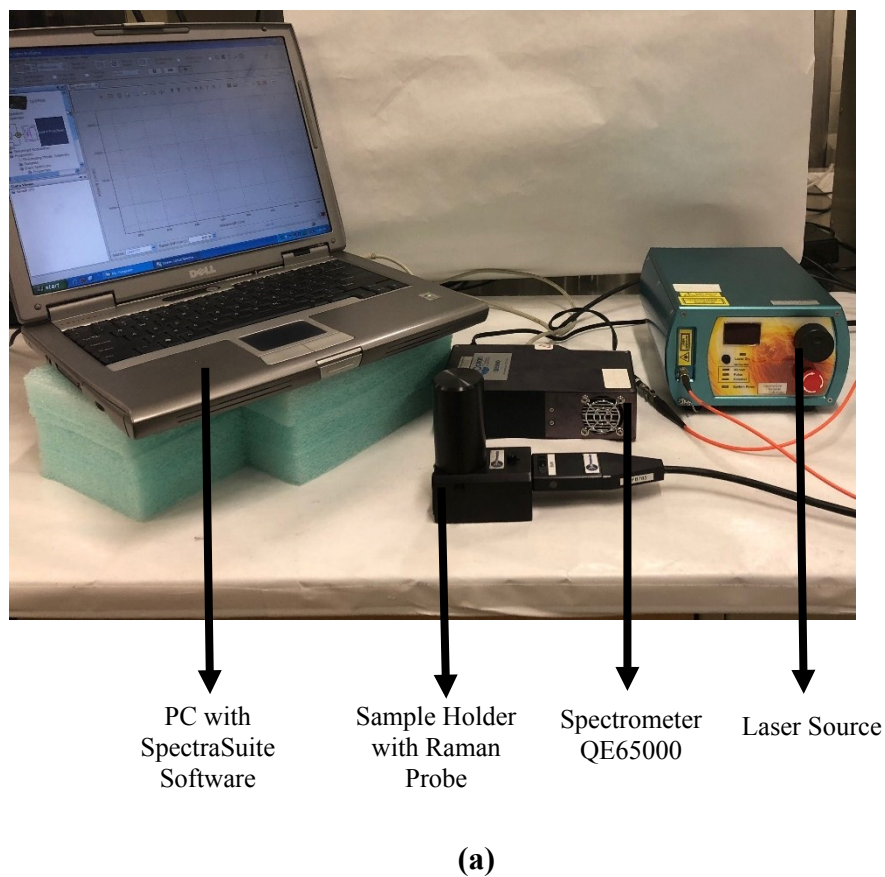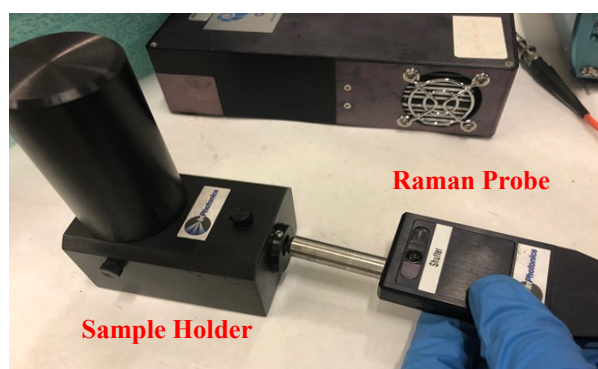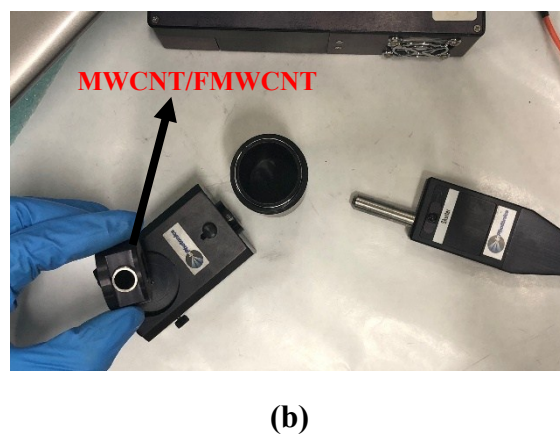

**Figure S2.** Raman spectroscopy of MWCNT and FMWCNT: (a) experiment setup, (b) Raman probe and the sample holder, and (c) MWCNT/FMWCNT in sample holder.

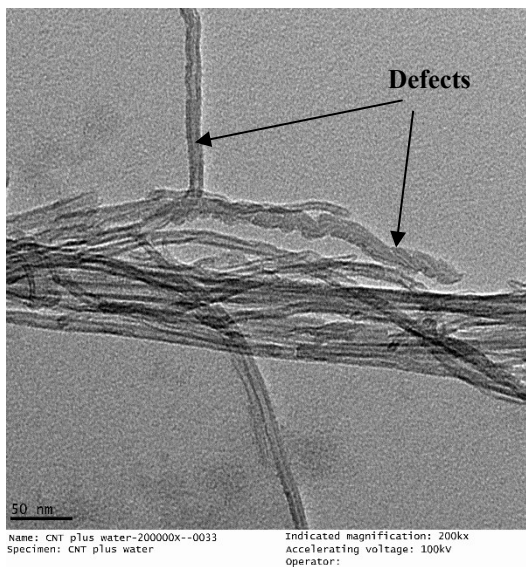

(a)

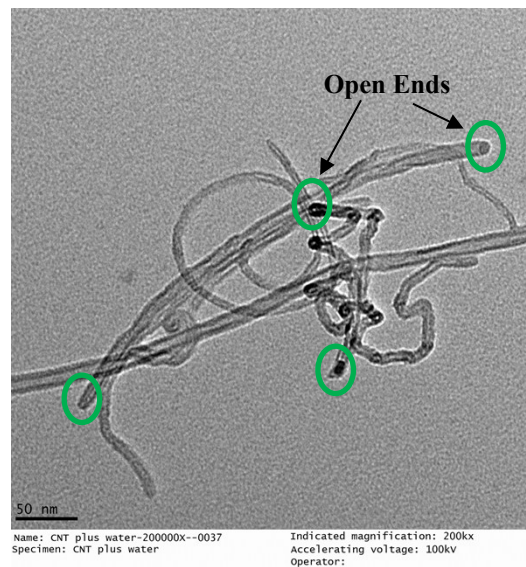

(b)

**Figure S3.** TEM micrographs of FMWCNT showing (a) defects on the sidewalls and (b) open ends.

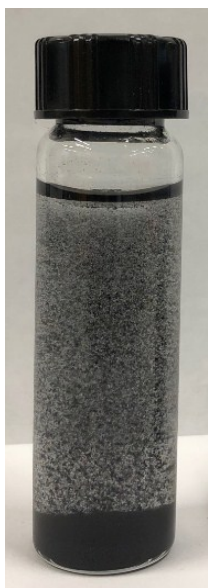

**MWCNT  
(60 seconds)**

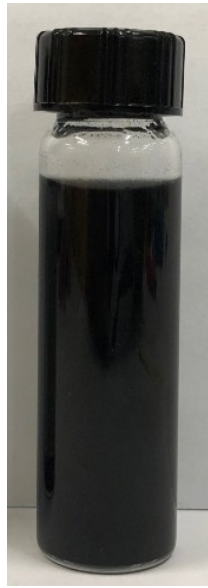

**FMWCNT  
(60 seconds)**

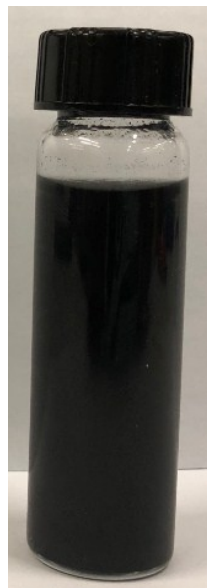

**FMWCNT  
(After 72 hours)**

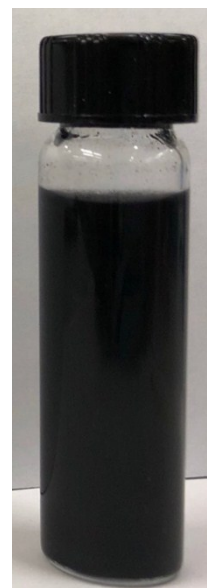

**FMWCNT  
(After 120 hours)**

**Figure S4.** Dispersion analysis of MWCNT and FMWCNTs for upto 5 days.
